# Supplementary material for: Saprophytic and pathogenic fungi in the Ceratocystidaceae differ in their ability to metabolize plant-derived sucrose
Source: PubMed Central journal article supplement (PMC4672557; doi:10.1186/s12862-015-0550-7), 2015-12-07

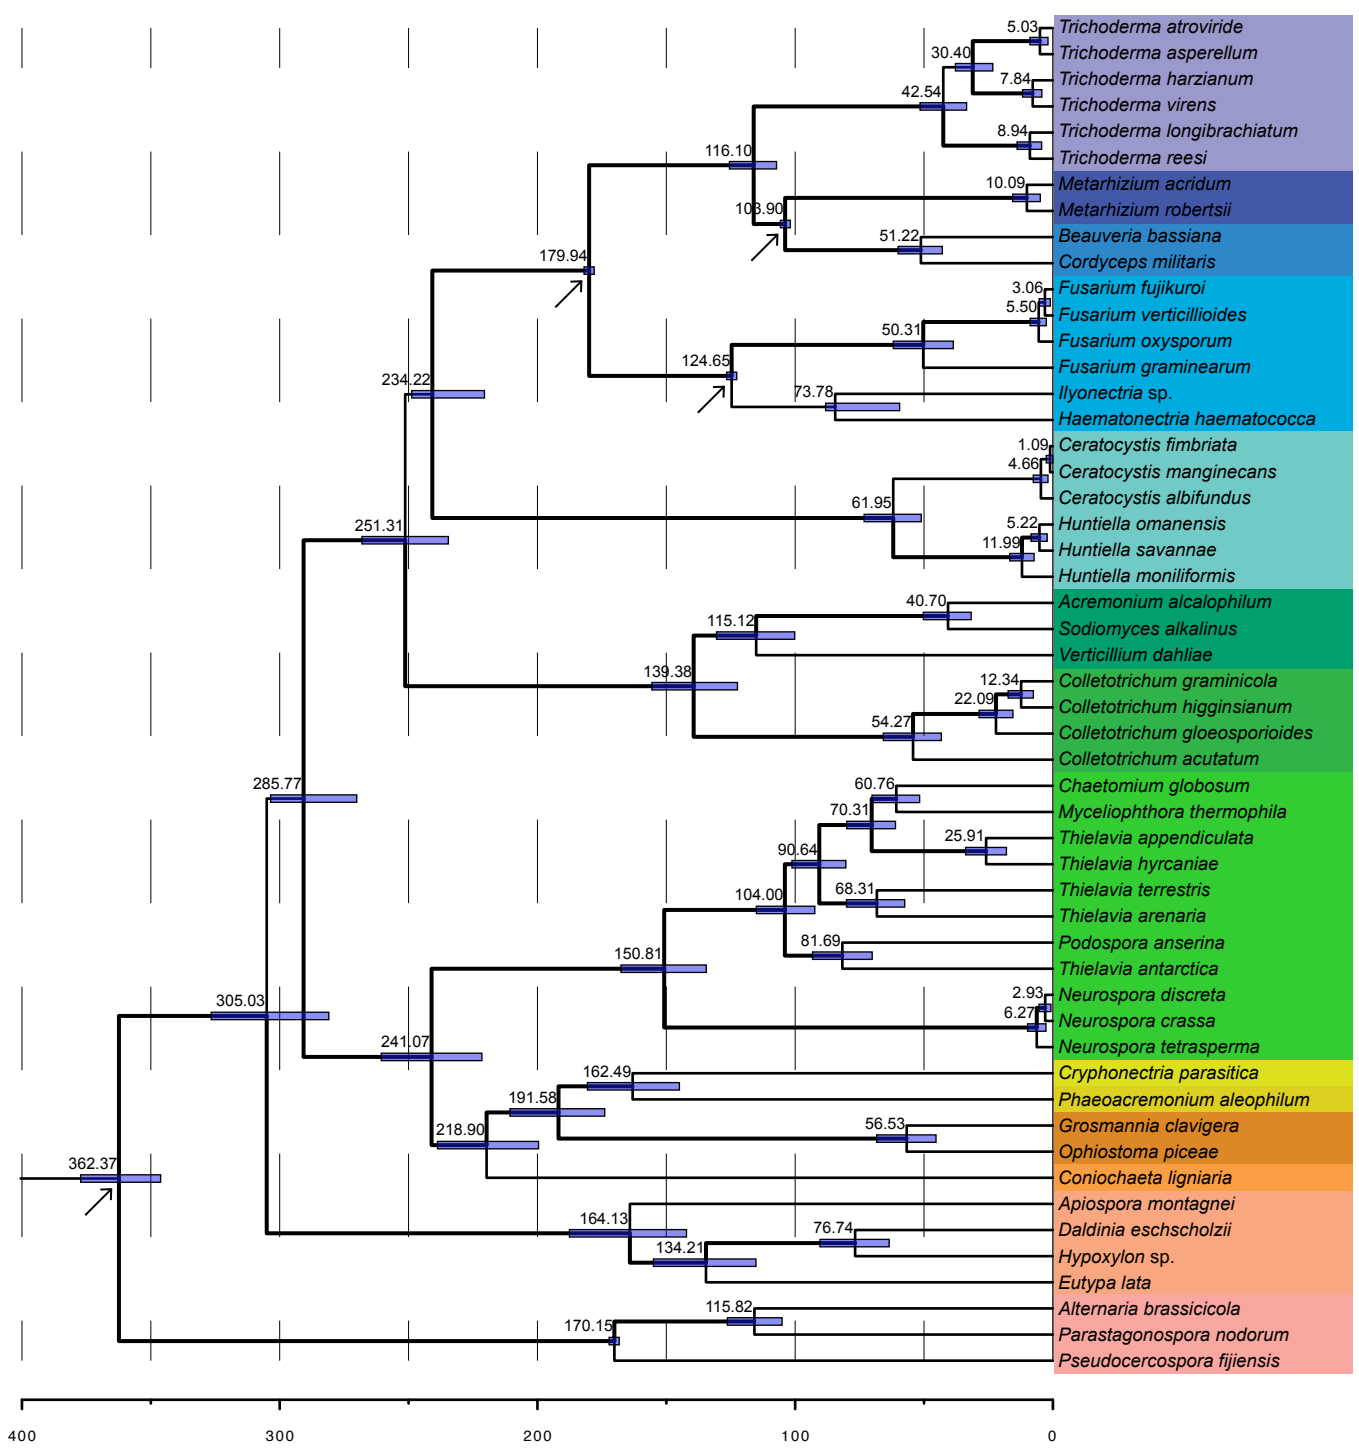

Supplement: 12862_2015_550_MOESM2_ESM.pdf [file 12862_2015_550_MOESM2_ESM.pdf]
